# Supplementary material for: Non-equilibrium conditions inside rock pores drive fission, maintenance and selection of coacervate protocells
Source: PubMed Central journal article supplement (PMC8755537; doi:10.1038/s41557-021-00830-y), 2021-12-06
Supplement: 41557_2021_830_MOESM1_ESM.pdf [file 41557_2021_830_MOESM1_ESM.pdf]

**Supplementary information**

---

**Non-equilibrium conditions inside rock pores drive fission, maintenance and selection of coacervate protocells**

---

In the format provided by the authors and unedited

1 **Non-equilibrium conditions inside rock pores drive fission, maintenance and**  
2 **selection of coacervate protocells**

3 Alan Ianeselli<sup>1,2</sup>, Damla Tetiker<sup>1</sup>, Julian Stein<sup>1,2</sup>, Alexandra Kühnlein<sup>1,2</sup>, Christof B. Mast<sup>1,2</sup>, Dieter Braun<sup>\*,1,2</sup>  
4 and T-Y Dora Tang<sup>\*,3</sup>

5 <sup>1</sup>Systems Biophysics, Ludwig Maximilian University Munich, Amalienstraße 54, 80799 München, Germany

6 <sup>2</sup>Center for NanoScience (CeNS), Ludwig Maximilian University, Amalienstraße 54, 80799 München, Germany

7 <sup>3</sup>Max-Planck Institute for Molecular Cell Biology and Genetics, Pfotenhauerstraße 108, 01307 Dresden, Germany

8 \*Corresponding authors: [tang@mpi-cbg.de](mailto:tang@mpi-cbg.de), [dieter.braun@lmu.de](mailto:dieter.braun@lmu.de)

9

10 **Supplementary information table of content:**

11

- 12 **1. Microscope scheme**
- 13 **2. Effect of buffer and polymer composition on coacervate assembly at the gas-water**  
14 **interface**
- 15 **3. Relationship between droplet growth and total polymer concentration**
- 16 **4. Control experiment without gas-water interface**
- 17 **5. Sedimentation of coacervate polymers**
- 18 **6. Division and fragmentation of CM-Dex:pLys coacervate droplets**
- 19 **7. Figure 4a extended: division by droplet stretching**
- 20 **8. Measurement of the binding constant of pLys:CM-Dex and pLys:RNA**
- 21 **9. Component ratio of the coacervates in the thermal pore**
- 22 **10. Figure 5 extended: RNA concentration vs final coacervate size**
- 23 **11. List of attached files**
- 24 **12. Author contribution**
- 25 **13. References**

26

27

28

29

30

31

32

33

34

35

36

37

38

39

40

41

42

43

44

45 **1. Microscope scheme**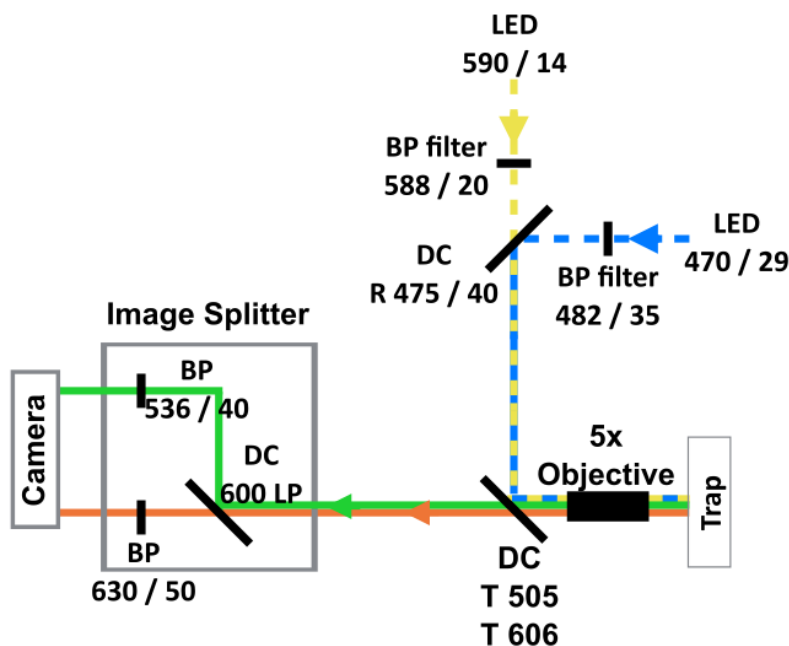

46

47 **Supplementary Figure 1. Schematic of the custom-built microscope.** The microscope was equipped with a blue LED  
 48 (470/29 nm), an amber LED (590/14 nm), excitation filters (482/35 nm, 588/20 nm), a dual bandpass dichroic mirror  
 49 (transmission edges at 505 nm and 606 nm), a 5X objective and an image splitter containing a longpass filter (600  
 50 nm) and emission filters (536/40 nm, 630/50 nm). This filterset allowed for the imaging of FITC (Fluorescein  
 51 Isothiocyanate) and ROX (Carboxy-X-Rhodamine). A Stingray-F145B ASG camera (ALLIED Vision Technologies GmbH)  
 52 was used to acquire images. The numbers next to the filters and the LEDs correspond to the light wavelength in  
 53 nanometers / FWHM.

54

55 The crosstalk from the FITC channel to the ROX channel was calculated with the following standard  
 56 protocol<sup>1</sup>:

57

$$crosstalk = \frac{DA_A}{AA_A}$$

58 where the first capital letter indicates the excitation wavelength (D), the second capital letter indicates  
 59 the emission wavelength (A), and the subscript index indicates which dye was used (D = FITC, A = ROX).  
 60 The crosstalk from the FITC to the ROX channel was measured to be approximately 7%. This is a relatively  
 61 low value which would not have affected the qualitative comparison made in Figure 5.

62

63

64

65 **2. Effect of buffer and polymer composition on coacervate assembly at the gas-water interface**

66 We studied the effect of the buffer composition and the type of coacervate polymer on the assembly and  
 67 growth of the coacervate droplets at the gas-water interface. Following the same procedure of the  
 68 experiments shown in Figure 3, we ran several experiments with slightly different conditions of buffer or  
 69 polymer composition, and temperature gradients. The mixtures were doped with 0.1 % FITC-labeled CM-  
 70 Dex or ATP. The results are schematized in Supplementary Figure 2. The droplet size over time was  
 71 quantified and shown in Figure 3e.

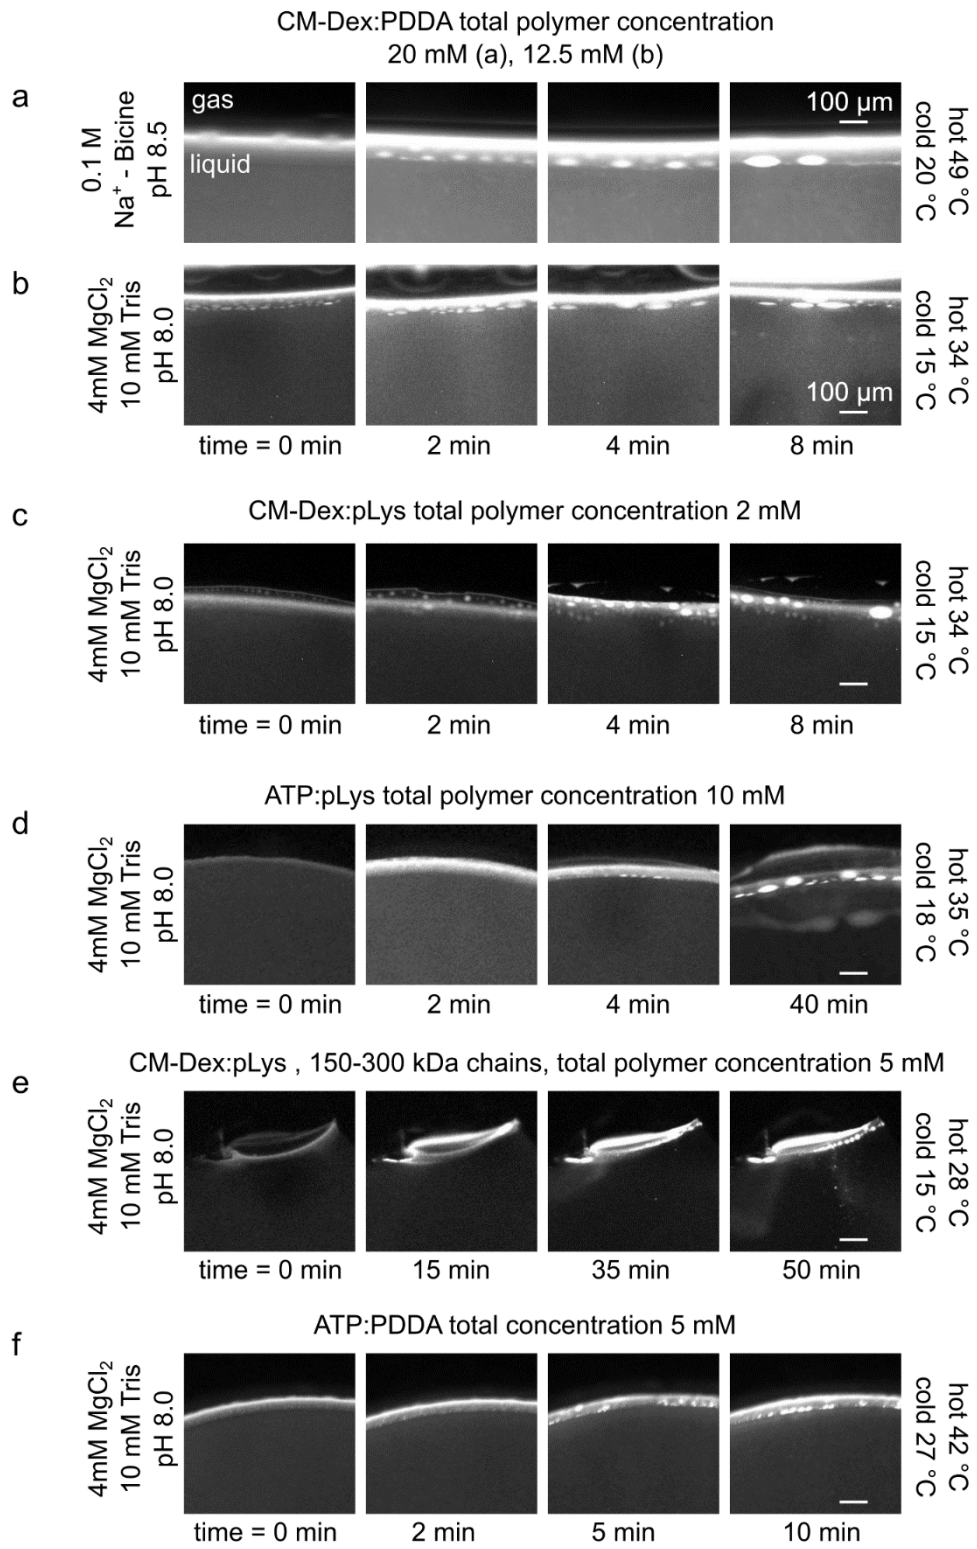

75 **Supplementary Figure 2. Effect of the buffer and polymer composition on coacervate growth at the gas-water**  
76 **interface.** Growth mechanism by fusion for different coacervate types (indicated above the image), for different  
77 buffers (indicated at the left) and different temperature gradients (indicated at the right). The scale bar indicates 100  
78  $\mu\text{m}$ .

79 When using a different buffer ( $\text{Na}^+$ -bicine or Tris- $\text{MgCl}_2$ ) or a different polymer (CM-Dex, pLys,  
80 PDDA or ATP), we observed only minor differences in the coacervate assembly process. The growth  
81 process (by fusion with other coacervate droplets), occurred with similar timescales and reached a similar  
82 threshold size in all the cases that we explored.

83

### 84 3. Relationship between droplet growth and total polymer concentration

85 We studied the effects of the total polymer concentration on the growth of the coacervate. To this end,  
86 we performed a series of experiments in a thermal gradient (warm side 49 °C and cold side 20 °C), buffer  
87 (4 mM  $\text{MgCl}_2$ , 10 mM Tris, pH 8.0) and the CM-Dex: PDDA (molar ratio 6:1, [carboxyl]/[amine] = 5), varying  
88 the total polymer concentration between 1 and 20 mM, doped with 0.1 % FITC-labeled CM-Dex. After  
89 inserting the coacervate solution in the thermal trap, we took a microscopy image every  $\sim 1$  second. The  
90 images were analyzed with ImageJ or LabVIEW to determine the growth rate and the average droplet size  
91 at the interface. The results are shown in figure S3.1. Every data point in the plot corresponds to an  
92 independent experiment.

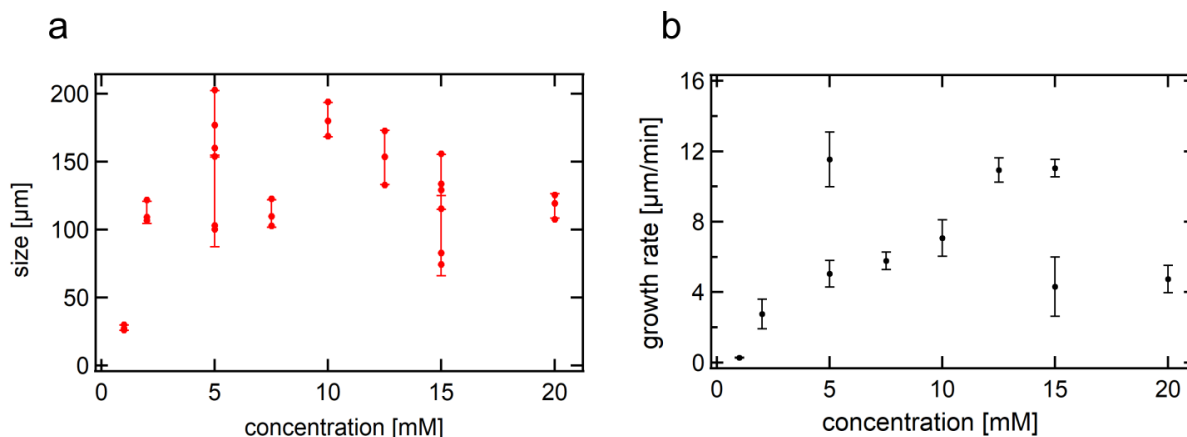

93 **Supplementary Figure 3.1. No clear relationship between coacervate growth and total polymer concentration.** (a)  
94 Average size at steady state (after  $\sim 1$ h of thermal gradient). Every set of data is represented by 3 points (the 3 largest  
95 coacervate droplets observed in the experiment) and the error bar (standard deviation). (b) Growth rate of the  
96 coacervate droplets as a function of polymer concentration. Error bars correspond to the standard deviation of the  
97 growth rate extracted from the linear fit of the size vs time traces (here not shown).  
98

99 Due to the intrinsic noise of our experiments, we could not determine any significant effect of the  
100 total polymer concentration on the final droplet size at steady state and their growth rate.

101 Below the critical coacervate concentration (CCC), polymers are not able to coacervate and form  
102 droplets. We tested whether the accumulation properties of the heated gas-water interfaces in our pores  
103 were able to concentrate the polymers to cross the CCC threshold and trigger coacervation. We used a  
104 CMDex:PDDA mixture (molar ratio 6:1, [carboxyl]/[amine] = 5), with a total polymer concentration below  
105 the CCC, doped with 0.1 % FITC-labeled CM-Dex. In previous experiments the CCC of CM-Dex:PDDA  $>1$ mM.  
106 Therefore, in the experiments that follow, we used a total polymer concentration of 0.2 mM and 0.05  
107 mM, in a buffer containing 4 mM  $\text{MgCl}_2$  and 10 mM Tris at pH 8 with a temperature gradient (hot side

108 49 °C, cold side 20 °C) (below the CCC). The polymer accumulation at the interface was imaged with  
109 fluorescence microscopy (Supplementary Figure 3.2).

110 Our results show that no coacervate droplets were observed in the system but there was visible  
111 polymer accumulation at the gas-water interface. This observation suggests that thermal trap acts at the  
112 mechanical level to favor the assembly and fusion of the existing coacervate droplets.

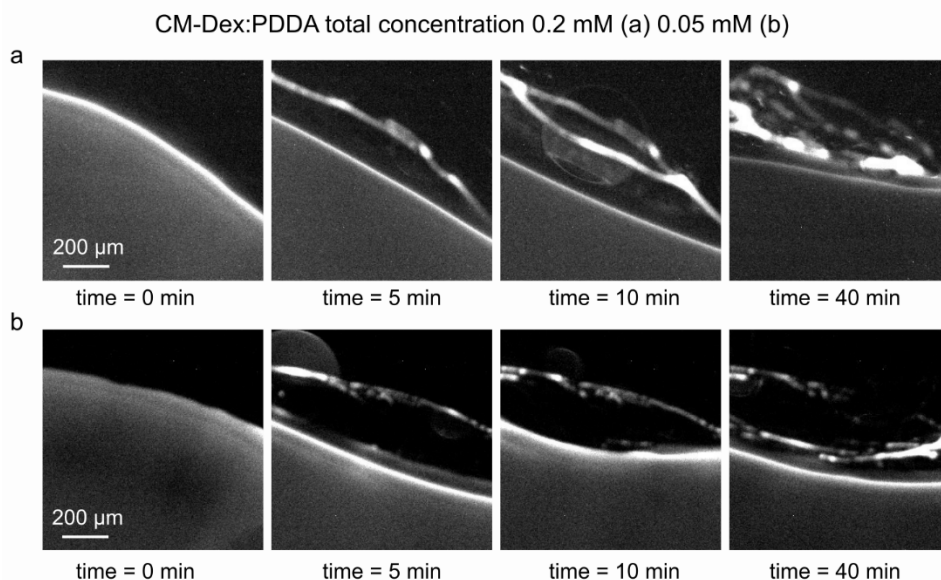

113  
114  
115 **Supplementary Figure 3.2. No coacervation below the critical coacervate concentration.** Optical microscopy images  
116 of the gas-water interface in the thermal trap at different times (0, 5, 10 and 40 minutes) of the coacervate mixture  
117 in the thermal pore, for 0.2 mM (a) or 0.05 mM (b) total polymer concentration. No coacervate droplets were  
118 observed at the gas-water interface or in the bulk despite the visible polymer accumulation.

119  
120 **4. Control experiment without gas-water interface**

121 In order to see the effect of the thermal gradient on coacervation, we characterized the effect of a thermal  
122 flow on coacervate droplets in a control experiment without gas bubbles (Figure S4).

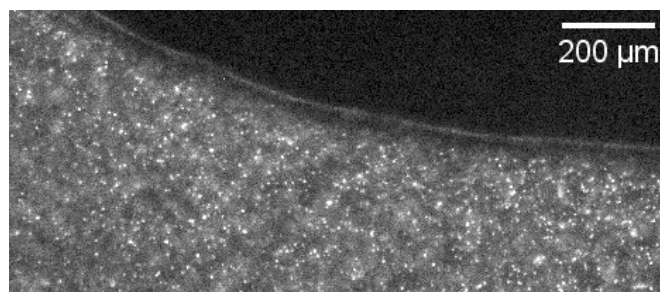

124  
125  
126 **Supplementary Figure 4. No large coacervate droplets in a thermal gradient without a gas bubble.** Coacervate  
127 droplets were prepared from CM-Dex:pLys (molar ratio 4:1, [carboxyl]/[amine] = 7, total polymer concentration 2  
128 mM), buffer 10 mM Tris, 4mM MgCl<sub>2</sub>, pH 8.0, temperature gradient of 29 °C. The image shows the fluorescence of  
129 pLys (0.1 % labeled with FITC). Small coacervate droplets (size < 10 μm) are seen moving with the convection flow.  
130 No larger coacervates (size > 15 μm) were observed forming in the system.

131 In the absence of the gas bubble, no large coacervates form in the chamber. Small coacervate  
132 droplets ( $< 15 \mu\text{m}$ ), which spontaneously formed during the initial mixing of the polymers, could be seen  
133 in the bulk transported by the convection flow at a speed of about  $1.6 \pm 0.4 \mu\text{m/s}$ . However, they did not  
134 fuse to form larger droplets. The gas-water interface has the role of accumulating small microdroplets and  
135 promote their fusion. In the experiments with a gas-water interface, we observed that the coacervate  
136 droplets could grow up to an average size of  $150 \mu\text{m}$ . Sometimes we could observe coacervate droplets  
137 as large as  $300 \mu\text{m}$ .

138  
139  
140

## 141 5. Sedimentation of coacervate polymers

142 We characterized the behaviour of the coacervate droplets under equilibrium condition. In the absence  
143 of a thermal gradient, no convection occurs in the liquid phase, and the coacervate droplets fall to the  
144 bottom of the channel, driven by gravity, to form a single coacervate macrophase. We studied the  
145 sedimentation dynamics of CM-Dex:pLys (molar ratio 4:1, [carboxyl]/[amine]=7, total polymer  
146 concentration 8 mM in 4 mM  $\text{MgCl}_2$ , 10 mM Tris at pH 8.0, doped with 0.1 % FITC-labeled CM-Dex) in a  
147 microfluidic chamber at room temperature ( $22 \text{ }^\circ\text{C}$ , no temperature gradient). The droplet size was  
148 determined as its horizontal width. The results are shown in Figure S5.1. The growth rate of the coacervate  
149 droplets by sedimentation is much slower (requires hours) than the growth rate at the heated gas-water  
150 interface shown in figure 3e (requires minutes). On the other hand, the final droplet size is much greater,  
151 and only constrained by the size of the microfluidic chamber.

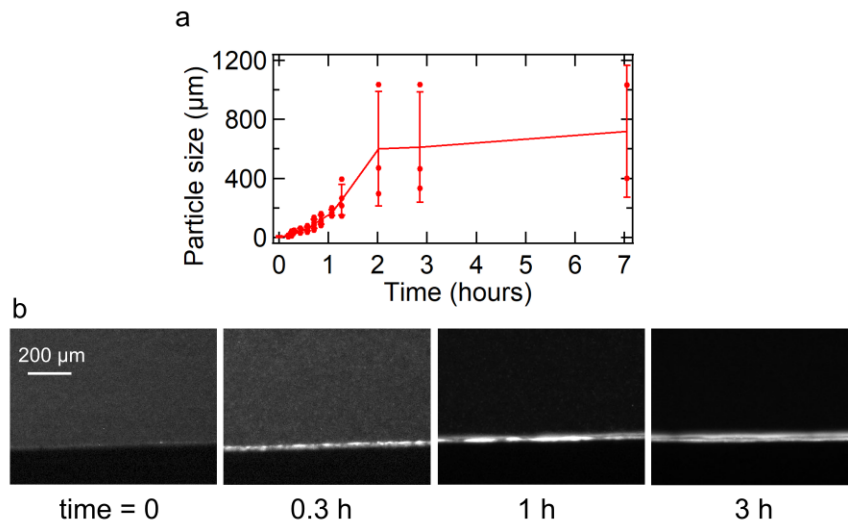

152 **Supplementary Figure 5.1. Sedimentation of coacervate droplets induced by gravity.** a) Quantification of droplet  
153 size over time. The droplets slowly sediment at the bottom of the chamber and fuse to become larger over the course  
154 of several hours. Error bars indicate standard deviation ( $n \sim 3$ ). b) Snapshots of the sedimentation at different times.  
155 The fluorescent layer at the bottom is the site of sedimentation.  
156

157 In the presence of the thermal gradient, a circular convective flow in the bulk arises. As we have  
158 already seen in our experiments, it transports the small coacervate droplets around in the bulk, preventing  
159 the sedimentation.

160 We simulated the sedimentation process by a 2D finite element simulation, using the software  
161 Comsol Multiphysics. We modeled the heat transfer, laminar flow, diffusion and transport of coacervate  
162 droplets in a thermal gradient, in a chamber equivalent to the one we used in our experiments ( $5 \text{ mm} \times$   
163  $500 \mu\text{m}$ ). The density of the coacervate droplets was set between  $1.01$  and  $1.10 \text{ g/cm}^3$  and their radius

164 was set to 5  $\mu\text{m}$  as determined from our experiments. The total polymer concentration was set to 1 mM.  
 165 The diffusion coefficient was calculated from the radius and the density, using the following Stokes-  
 166 Einstein equation:

$$167 \quad D = \frac{k_B T}{6 \pi r_0 \mu_B(T)}$$

168 where  $k_B$  is the Boltzmann constant  $1.38\text{e-}23$  J/K,  $T$  is the temperature,  $r_0$  is the droplet radius and  $\mu_B$  is the  
 169 bulk viscosity. The thermal gradient was varied between 0  $^\circ\text{C}$  and 85  $^\circ\text{C}$ . Results are shown in  
 170 Supplementary Figure 5.2.

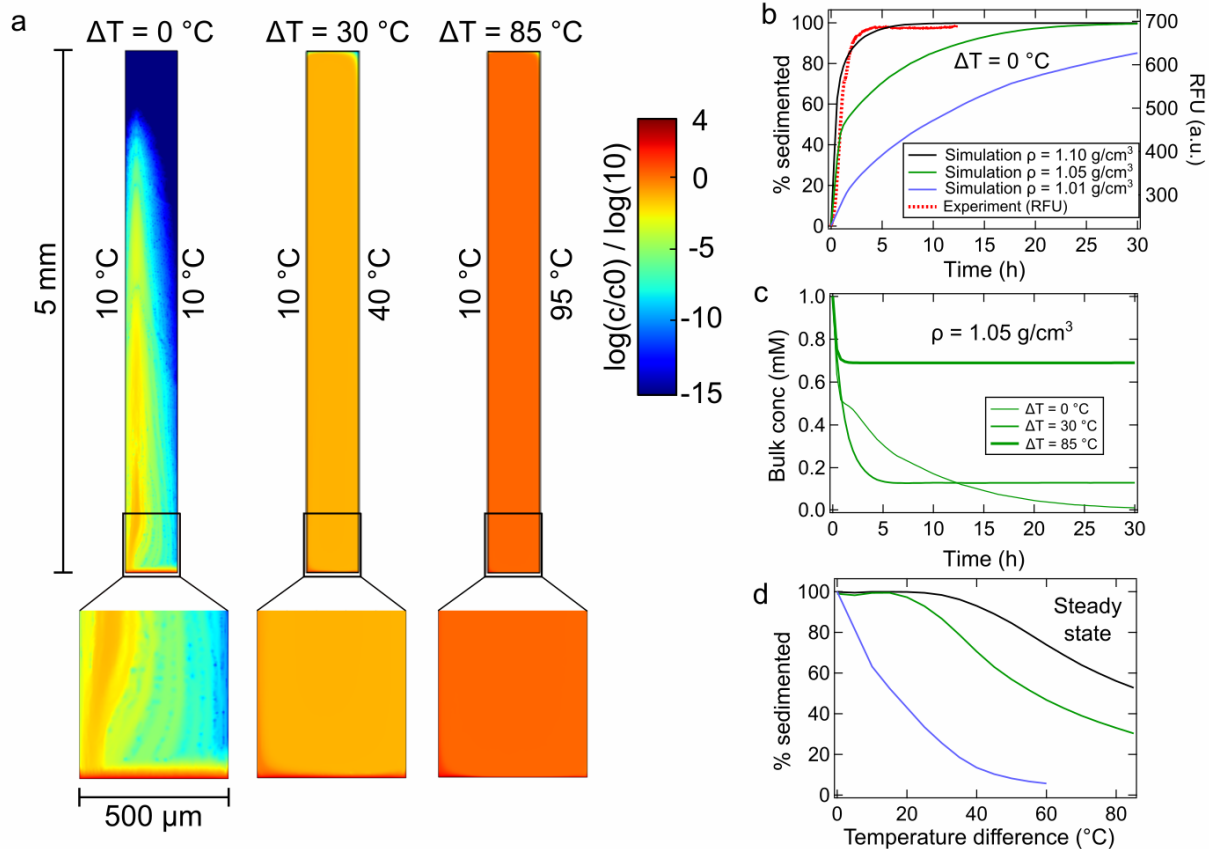

171  
 172 **Supplementary Figure 5.2. Finite element simulation of the sedimentation of coacervate droplets in our thermal**  
 173 **trap.** a) Distribution of coacervate concentration in a trap section after 10 h, for  $\Delta T$  of 0, 30 and 85 K. The coacervate  
 174 density coefficient used here was  $1.1$  g/cm<sup>3</sup>. b) Sedimentation % over time at isothermal temperature for 3 different  
 175 densities. Red dotted line corresponds to experimental data (the experiment illustrated in Supplementary Figure 5.1).  
 176 c) Bulk coacervate concentration over time calculated for different temperature gradients. d) Sedimentation % at  
 177 steady state (simulation time = 30 h) as a function of the temperature gradient  $\Delta T$  and for different densities.

178 In the absence of the thermal gradient, almost 100% of the coacervate droplets sediment to the  
 179 bottom of the chamber within 10 hours, driven by gravity (Supplementary Figure 5.2a, left). The timescale  
 180 of sedimentation depends on the density coefficient of the droplets. The best agreement between  
 181 experiments and simulation occurs for a density coefficient between  $1.10$  and  $1.05$  g/cm<sup>3</sup> (Supplementary  
 182 Figure 5.2b). Note that the comparison between experiment and simulations is purely qualitative  
 183 (expressed in arbitrary RFU), due to the difficulty in accurately calculating the total fraction of sedimented  
 184 coacervates by fluorescence microscopy.



185 The total sedimented fraction depends on the convection triggered by the thermal gradient  
186 (Supplementary Figure 5.2a middle, right pictures, and S5.2c-d). Our results show that a fraction of  
187 droplets will sediment even in the presence of the thermal gradient. However, our simulations show that  
188 temperature gradients between 19 and 40 °C will prevent the sedimentation of the coacervate fraction  
189 by 3 - 30 %. Furthermore, simulations, up to 96 hrs show that the droplets remain in the bulk solution  
190 indicating that with the thermal flow the droplets are prevented from sedimenting (data not shown). Note  
191 that the data shown in Supplementary Figure 5.2d represent the final sedimented fraction at steady state.

192 Experiments undertaken within the thermal trap with dispersions of coacervate droplets  
193 (ATP:PDDA droplets, 5 mM total concentration) that were subjected to shallow temperature gradients  
194 (hot side 42 °C, cold side 27 °C) showed droplets at the gas-water interface after 30 hrs (Supplementary  
195 Figure 5.3). Taking this into account, it is likely, that our experiment will reduce sedimentation further as  
196 the gas-water interface introduce additional flows to the system (e.g. capillary flows) that accumulate and  
197 maintain coacervate droplets at the gas-water interface. In summary, the thermal gradient is able to  
198 reduce the sedimentation of coacervates, maintaining a fraction of droplets to circulate in the bulk.  
199

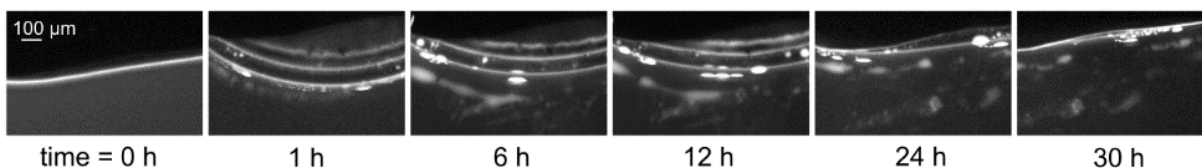

200 **Supplementary Figure 5.3. Coacervate droplets are retained at the gas-water interface and do not sediment.**  
201 *ATP:PDDA coacervate droplets formed at the gas-water interface do not undergo sedimentation for at least 30 hours.*  
202  
203

## 204 6. Division and fragmentation of CM-Dex:pLys coacervate droplets

205 We have already shown in Figure 4 that CM-Dex:PDDA droplets in a thermal gradient can divide and be  
206 fragmented by the forces acting at the gas-water interface (capillary flows and perturbative fluxes). In  
207 additional experiments, we observed the same division and fragmentation processes happening for  
208 solutions containing a different coacervate composition: CM-Dex:pLys (molar ratio 4:1,  
209 [carboxyl]/[amine]=7, total polymer concentration 5 mM, doped with 0.1 % FITC-labeled CM-Dex). The  
210 results are shown in the Supplementary Figure 6.

211 The coacervate droplet at the gas-water interface (yellow arrow) was stretched by the capillary  
212 forces, until the coacervate droplet started to divide, and the two daughter droplets separated. The event  
213 occurred in a time window of approximately 200 seconds.

214 Supplementary Figure 6b shows the fragmentation of coacervates. The precipitation of water re-  
215 increased the water level and moved the gas-liquid interface slightly upwards. Therefore, the accumulated  
216 coacervates that were stuck in a quasi-dry state on the hot sapphire were re-dissolved into the liquid. The  
217 perturbative fluxes induced by the water precipitation induced the fragmentation of the polymers,  
218 creating smaller droplets that fell into the bulk and started circulating with the convection flow.

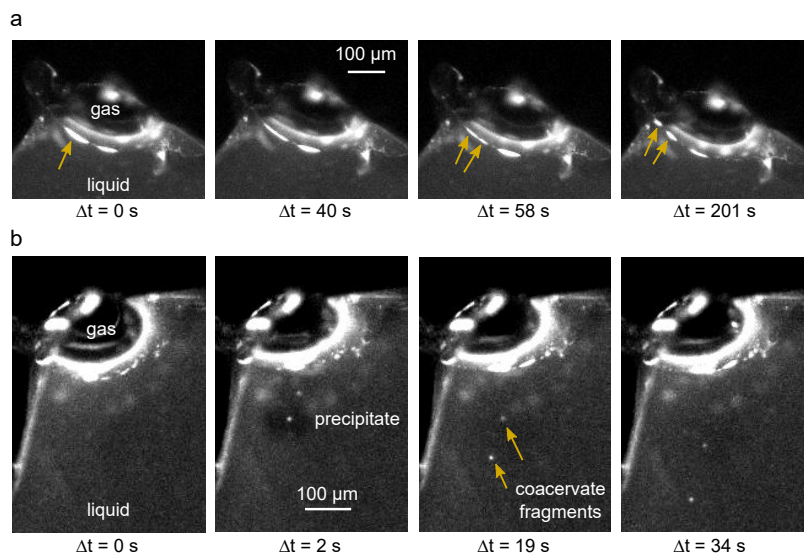

219

220 **Supplementary Figure 6. Division of CM-Dex:pLys coacervate droplets at the gas-water interface.** a) Fission of a  
 221 CM-Dex:pLys droplet into two smaller droplets induced by forces at the gas-liquid interface. b) Water precipitation  
 222 rehydrates the stuck coacervates and induces fission by fragmentation. The temperature gradient for both  
 223 experiments was: warm side 26 °C, cold side 15 °C.

224 The division mechanisms described here and in Figure 4 are purely physical phenomena. The  
 225 chemical composition of the coacervate droplets seems to play a minor role, as we observed similar events  
 226 for coacervate droplets made of CM-Dex:PDDA or CM-Dex:pLys. We therefore consider these division  
 227 mechanisms to have played an important role in the primordial division of protocells, since they derive  
 228 from the physical properties of the environment only and do not require any specific chemical component  
 229 or active biological machinery. The simple and ubiquitous setting of a gas bubble within a thermal gradient  
 230 contains all the physical properties to trigger these type of division mechanisms.

231

## 232 7. Figure 4a extended: division by droplet stretching

233 The dynamics of the dividing coacervate droplet (Figure 4a) was tracked throughout the timeframe of the  
 234 experiment to confirm that the division event was not an artefact arising from the 2D imaging technique,  
 235 as this type of imaging does not provide information in the x-axis of our thermal pore. In particular, we  
 236 wanted to test whether two coacervate droplets could have hidden behind one other and then moved  
 237 parallel in the x-axis, creating a visual artifact similar to a division event.

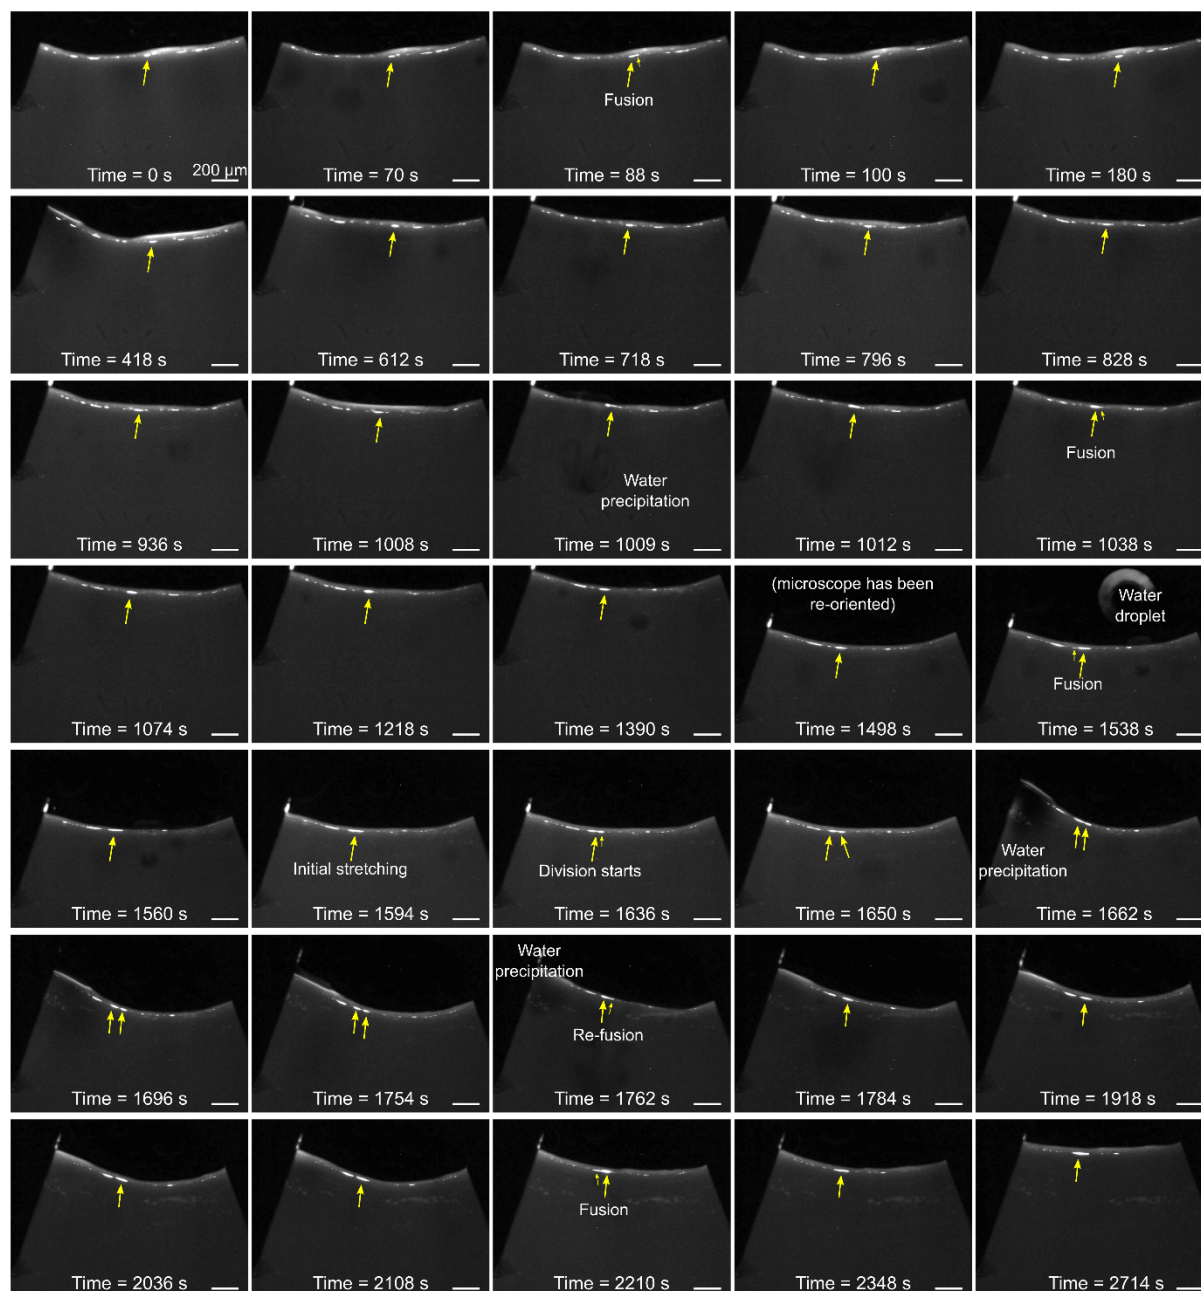

238

239 **Supplementary Figure 7. Coacervate division by stretching.** Images at different times of the coacervate droplet that underwent  
 240 division in Figure 4a. Experimental conditions were: CM-Dex:PDDA (molar ratio 6:1, [carboxyl]/[amine] = 5), total concentration 2  
 241 mM in 4 mM MgCl<sub>2</sub>, 10 mM Tris, pH 8.0, doped with 0.1 % FITC-labeled CM-Dex. The temperature gradient was 19 °C with the  
 242 warm side 34 °C, cold side 15 °C. The time reported in the pictures is not the absolute time of the start of the experiment, but is  
 243 relative to the arbitrary starting point indicated in the first picture.

244 Careful analysis of the full time frame (frame rate 0.75 fps) of coacervate division events at the  
 245 air-water interface (Supplementary Figure 7) showed repeated fusion and water precipitation events for  
 246 many minutes, until the droplet started to undergo division (time ~ 1500s). We do not observe any  
 247 indication of a second droplet moving behind the droplet of interest (indicated with a yellow arrow). It  
 248 can be also seen that the droplet of interest remains distinct for several minutes before undergoing a

249 division event. As the constrained thickness of the pore (x-axis size) is 250  $\mu\text{m}$  and the daughter droplets  
 250 measure approximately 90  $\mu\text{m}$ , it is highly unlikely that two droplets of similar size will coexist behind  
 251 each other without coalescence. Especially, when considering that capillary flow at the gas-water  
 252 interface pushes towards the warm side that facilitates fusion events and that we typically observe fusion  
 253 events between droplets in close proximity to each other within 10 seconds (Figure 3d). Our results  
 254 indicate that there is no artefact of droplet fusion that arises from the imaging method used in our  
 255 experiments.

256

257 **8. Measurement of the binding constant of pLys:CM-Dex and pLys:RNA**

258 In Figure 5, we observed that RNA:pLys droplets are preferentially formed when a mixture of RNA, pLys  
 259 and CM-Dex is provided. To gain a better understanding in the mechanism responsible of that  
 260 phenomenon, we measured the binding constant  $K_D$  of the RNA:pLys and of the CM-Dex:pLys complexes.  
 261 Measurements have been done using a Nanotemper NT.115 Pico machine, which measures a binding  
 262 dependent fluorescence signal upon local heating with IR laser.

263 Serial dilutions of CM-Dex (15 kDa) or RNA (single stranded, 51 nt) were mixed together with a  
 264 constant amount of FITC-labeled pLys (15-30 kDa). While the final FITC-pLys concentration was  
 265 maintained constant at 20 nM, CM-Dex and RNA concentrations spanned many orders of magnitude  
 266 ranging from 0.1 nM to 1  $\mu\text{M}$ . The solutions of CM-Dex: pLys or RNA: pLys were inserted into thin glass  
 267 capillaries and placed on an aluminium holder and then inside of the Nanotemper NT.115 Pico machine.  
 268 Therefore, the fluorescence of the sample was measured over time. A focused IR laser beam was used to  
 269 locally heat the solution inside the capillaries, and the intensity response was measured. To calculate the  
 270  $K_D$ , the obtained data have been fitted with the following model:

271

272  $f(\text{Conc})$   
 273 
$$= U + \frac{(B - U) \cdot (\text{Conc} + \text{TargetConc} + K_D - \sqrt{(\text{Conc} + \text{TargetConc} + K_D)^2 - 4 \cdot \text{Conc} \cdot \text{TargetConc}})}{2 \cdot \text{TargetConc}}$$
  
 274  
 275 (1)  
 276

277 where  $U$  and  $B$  indicate the fluorescence response values of the unbound (after IR heating) and bound (no  
 278 IR heating) states, respectively. TargetConc corresponds to the concentration of the labeled species (pLys),  
 279 and  $K_D$  corresponds to the binding constant. Conc indicates the concentration of CM-Dex (Figure S8.1a) or  
 280 RNA (Figure S8.1b).

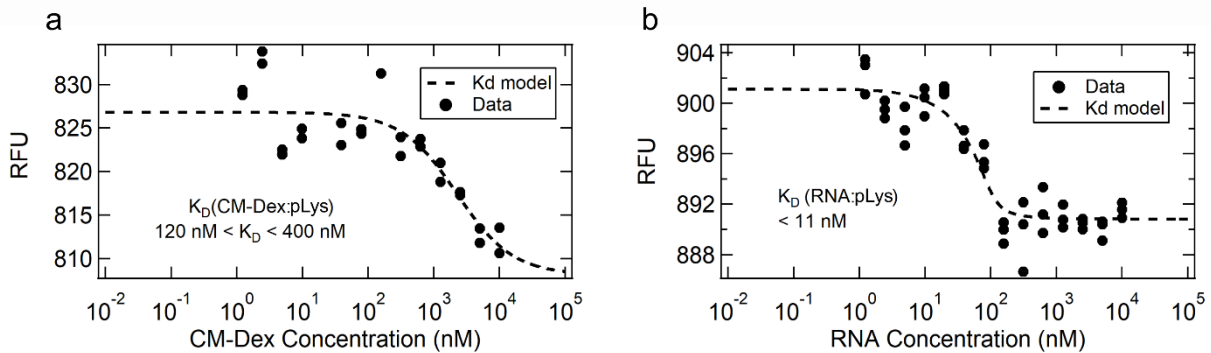

281

282 **Supplementary Figure 8.1. Measurement of the binding constant  $K_D$ .** Dose-response curves for the CM-Dex: pLys  
 283 complex (a) or for the RNA: pLys complex (b). The dots indicate experimental data, and the dashed line corresponds

284 to the fit (equation 1).

285 Instead of estimating a single value for the binding constant, we preferred to estimate a range  
286 where it most likely lies within. We achieved that by estimating the NRMSD (Normalized Root Mean  
287 Squared Deviation) between the data and the model. We arbitrarily chose a NRMSD threshold of 15% to  
288 estimate the range. NRMSD was defined as:

$$289 \quad NRMSD = \frac{RMSD}{RFU_{max} - RFU_{min}}$$

290 where *RMSD* corresponds to the root mean squared deviation of the data.  $RFU_{max}$  and  $RFU_{min}$  are the  
291 maximum and minimum values of the RFU data. The binding constant ( $K_D$ ) of the CM-Dex:pLys complex  
292 resulted to be higher than the  $K_D$  of the RNA:pLys complex ( $120 \text{ nM} < K_D < 400 \text{ nM}$  against  $K_D < 11 \text{ nM}$ ),  
293 suggesting stronger binding of the RNA:pLys complex. This result can possibly explain what we observed  
294 in Figure 5. In a solution containing all the three components (CM-Dex, RNA and pLys), pLys preferentially  
295 creates complexes with RNA, since their binding is stronger.

296 To further investigate whether the separation of coacervate populations in the thermal trap is  
297 driven by overcoming the binding constants at the gas-water interface, we performed additional control  
298 experiments. We studied a mixture of CM-Dex, pLys and RNA (total polymer concentration 2 mM) in the  
299 absence of a gas bubble, at temperature gradients (34 - 15 °C, as described previously) and at higher  
300 temperatures gradients (81 - 74 °C). The higher temperature is expected to overcome the binding  
301 constants, leading to the formation of bulk coacervate droplets enriched in all 3 components: the same  
302 effect induced by the gas-water interface (Figure 5).

303 At low temperatures (Supplementary Figure 8.2a), the bulk coacervate droplets seemed to be  
304 mostly made of pLys and RNA with a low, almost indistinguishable fluorescence signal from CM-Dex within  
305 the coacervate droplets (Supplementary Figure 8.2 left). In comparison, experiments undertaken at higher  
306 temperatures (Supplementary Figure 8.2b) show evidence of three components (CM-Dex, pLys and RNA)  
307 by three fluorescent channels, suggesting that the bulk droplets were enriched in all three components.  
308 Our results indicate that, the higher temperatures could override the binding constant and trigger the  
309 interaction between all the three polymer components. Therefore, these results support our hypothesis  
310 that the gas-water interface helps to overcome the binding constants at lower temperatures.

311  
312



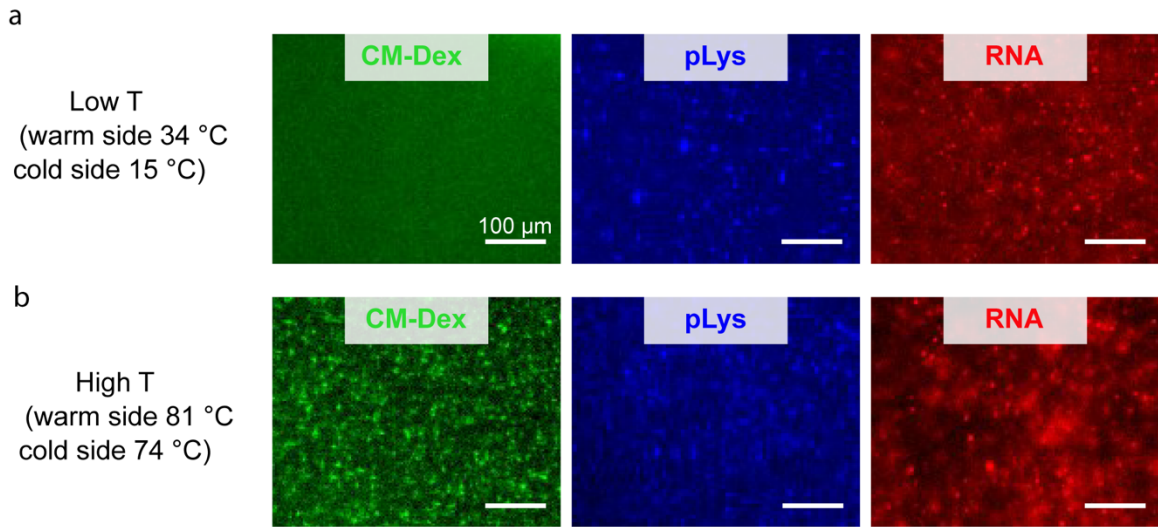

313  
 314 **Supplementary Figure 8.2. Bulk droplets enriched in all three components form at higher temperatures.** a) At low  
 315 temperatures (34 °C - 15 °C gradient), the bulk droplets are preferentially enriched in pLys and RNA, while poor in  
 316 CM-Dex. b) At higher temperatures (81 °C - 74 °C gradient) the binding constants are overridden by the increased  
 317 kinetic energy and the bulk coacervate droplets are enriched of all three components. Every picture corresponds to a  
 318 different experiment. The solutions contained: 10 mM MgCl<sub>2</sub>, 10 mM Tris, pH 8. CM-Dex:pLys [carboxyl]/[amine] = 7,  
 319 molar ratio 4:1. Total polymer concentration was 2 mM, RNA concentration 1 μM. Note that every picture  
 320 corresponds to a separate experiment.

321

## 322 9. Component ratio of the coacervates in the thermal pore

323 To characterize the effect of the water-air interface on properties of the coacervate droplets we  
 324 measured the zeta potential ( $\zeta$ ) of coalescing coacervate droplets (CM-Dex:pLys) in bulk solution over time  
 325 and compared this to any observed changes in the charge ratio determined by image analysis of the  
 326 droplets within the thermal trap. The  $\zeta$  potential corresponds to the difference between the potential on  
 327 the shear surface of the droplet and the potential of the solution and is an indirect measure of the charge  
 328 ratio at the surface of the droplet. To do this, dispersions of CM-Dex:pLys coacervate droplets at 2 mM in  
 329 10 mM Tris and 4 mM MgCl<sub>2</sub> at pH 8 (CM-Dex:pLys molar ratio 4:1, [carboxyl]/[amine] = 7) were prepared  
 330 and immediately loaded into folded capillary cells (DTS1070) so that the water level was above the gold  
 331 electrodes with no air bubbles observable to the eye. The cell was loaded into a Zetasizer Nano ZS (Pzen  
 332 5600) that was preheated at 30 °C. The sample was incubated for 10 minutes and 5 runs of 10 seconds  
 333 were taken using the 173° backscatter mode to obtain dynamic light scattering data. This measurement  
 334 was repeated 3 times. The sample was then subjected to zeta potential measurements which consisted  
 335 of 10 secs equilibration time followed by 3 measurements of 10 runs with 300 secs between each  
 336 measurement. This cycle was repeated over at least 2.5 hrs. The Zeta sizer was controlled using the  
 337 manufacturer's zetasizer software which undertook the analysis of the data using the general purpose  
 338 analysis mode (light scattering) and the Smoluchowski model (Zeta measurements) using 1.378 and 1.334  
 339 for the refractive index for the coacervate and supernatant respectively.

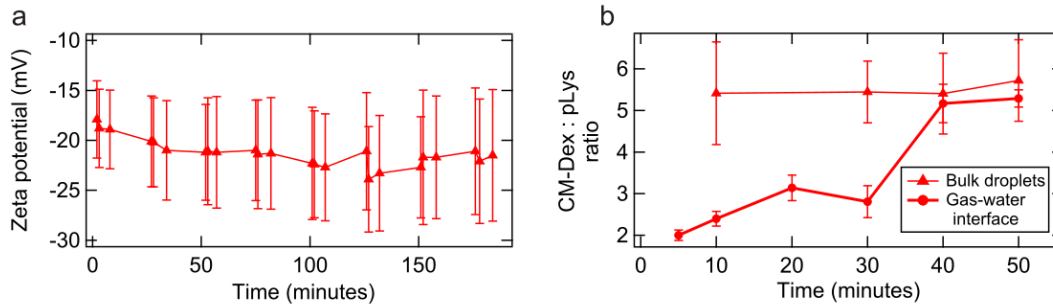

340

341 **Supplementary Figure 9.1. Surface charge remains constant over time in the bulk droplets, while changes at the**  
 342 **gas-water interface.** a) Measurement of the Zeta potential of the bulk droplets (isothermal bulk experiment). The  
 343 error bars represent the standard deviation. b) Ratio between CM-Dex and pLys (no RNA) in the bulk droplets  
 344 (triangles) or at the gas-water interface (circles). The experiment of (b) was made in a thermal trap (cold side 10°C,  
 345 warm side 36 °C).

346 We did not find a significant change in the surface charge over time (Figure S9.1a). Even though  
 347 this measurement was performed in the bulk solution and under isothermal conditions, we observed  
 348 analogous behavior within the bulk region in the trap experiment (Figure S9.1b). This was determined by  
 349 fluorescence microscopy, by performing different experiments with FITC-labeled CM-Dex or pLys. We  
 350 characterized the ratio of the polymers of the coacervate droplets assembled at the gas-water interface  
 351 and in the bulk of our thermal pores. Conversely, at the gas-water interface, a change in the polymeric  
 352 ratio could be observed during time. This could be attributed to differential accumulation of the individual  
 353 polymers at the gas-water interface, driven by different diffusion coefficients, that variably enriched the  
 354 droplets.

355 Furthermore, we undertook image analysis of dispersion of CM-Dex:pLys:RNA (51 nt) (1.6 mM,  
 356 0.4 mM, 1 μM, respectively), in a buffer containing 10 mM Tris, 4 mM MgCl<sub>2</sub>, pH 8 within the  
 357 thermophoretic pore. The temperature gradient was: hot side 34 °C, cold side 15 °C. The data shown in  
 358 Supplementary Figure 9.2 have been obtained by analyzing the dual-channel fluorescence movies over  
 359 time where two of the three polymers were labeled. [Note that the ratios in Figure S9.2 are given as molar  
 360 ratios between the polymers, not as ratios between chemical groups (e.g. [carboxy]/[amine]).

361 The analysis shows that the ratio of the components in the droplets changes over time. Both the  
 362 ratios CM-Dex:RNA (Supplementary Figure 9.2a) and pLys:RNA (Supplementary Figure 9.2b) decreased  
 363 over time, while the CM-Dex:pLys ratio (Supplementary Figure 9.2c) remained almost constant. This can  
 364 be explained by the fact that the droplets, both at the interface and in the bulk (Supplementary Figure  
 365 9.3), become enriched in RNA over time. The coacervate droplets in the bulk were particularly poor in  
 366 CM-Dex in comparison to the coacervates assembled at the gas-water interface (Supplementary Figure  
 367 9.2d).

368

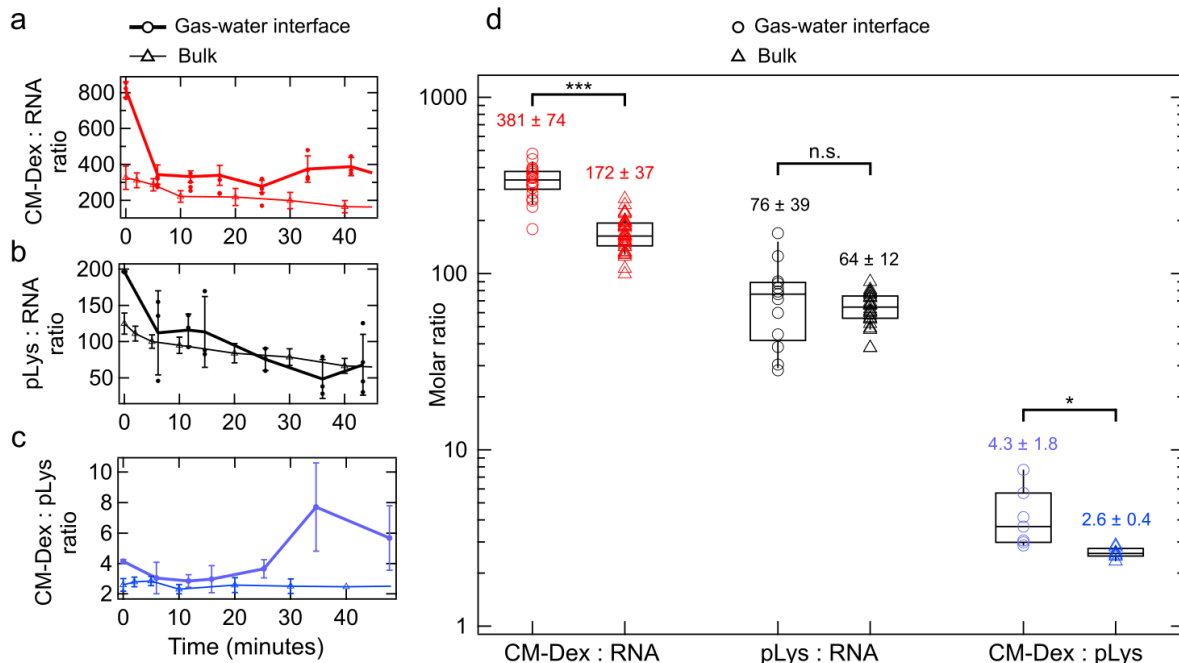

369

370 **Supplementary Figure 9.2. Component ratio of a CM-Dex:pLys:RNA mixture in the thermal pore.** The droplets  
 371 become enriched in RNA over time. CM-Dex:RNA (a), pLys:RNA (b) and CM-Dex:pLys molar ratios over time calculated  
 372 on the coacervate droplets at the gas-water interface (thick lines with circles) or in the bulk (thin lines with triangles).  
 373 d) Box plots of the ratios from a-c at steady state. The statistical difference between gas-water interface (circles) and  
 374 bulk (triangles) was tested with a t-test.

375

376

377

378

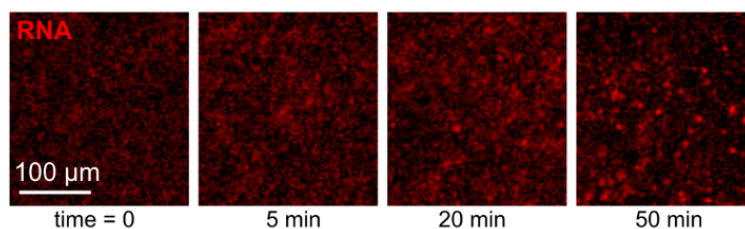

379

380 **Supplementary Figure 9.3. RNA enrichment in the bulk coacervate droplets over time.** Fluorescence images (RNA  
 381 fluorescence) of the bulk coacervate droplets at different times. An increase in the fluorescence levels is clearly visible.

382

383

384

385



386 **10. Figure 5 extended: RNA concentration vs final coacervate size**

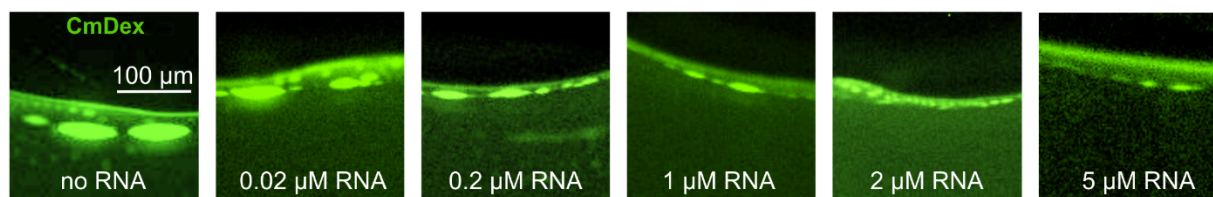

387

388 **Supplementary Figure 10. RNA reduces the size of CM-Dex:pLys droplets in a concentration-dependent manner.**

389 From left to right: no RNA, 0.02 mM RNA, 0.2 μM RNA, 1 μM RNA, 2 μM RNA, 5 μM RNA were added in a solution of  
390 CM-Dex:pLys (molar ration 4:1, [carboxyl]/[amine] = 7) at a concentration of 2 mM containing 0.1% of FITC-labeled  
391 CM-Dex in a buffer made of 4 mM MgCl<sub>2</sub>, 10 mM Tris at pH 8. The images show the resulting coacervates at the gas-  
392 water interface after ~1h of temperature gradient (warm side 34 °C, cold side 15 °C).

393

394 **11. List of attached files**

395 supplementary\_movie\_1\_coacervate\_fusion.avi  
396 supplementary\_movie\_2\_coacervate\_division.avi  
397 supplementary\_movie\_3\_coacervate\_fragmentation.avi  
398 supplementary\_movie\_4\_dual\_channel.avi

399

400

401 **12. Author contribution**

402 A.I., T-Y.D.T., C.B.M., D.B. designed the study. A.I., T-Y.D.T., J.S., A.K. performed the experiments. A.I.  
403 analyzed the data. A.I., T-Y.D.T., J.S., A.K., C.B.M., D.B., T-Y.D.T. wrote the manuscript.

404

405 **13. References**

406 (1) Ianeselli, A.; Mast, C. B.; Braun, D. Periodic Melting of Oligonucleotides by Oscillating Salt  
407 Concentrations Triggered by Microscale Water Cycles Inside Heated Rock Pores. *Angew. Chemie*  
408 *Int. Ed.* **58**, 13155-13160 (2019).

409
